1 **A triple bottom line approach to antimicrobial stewardship: the effects of**  
2 **simplifying treatment**

3 Michelle Balm<sup>1,2</sup>, Olivia Bupha-Intr<sup>1</sup>, Tanya Sinha<sup>2</sup>, Matthew Kelly<sup>1</sup>, Lucy Stewart<sup>3</sup>, Ruth Stephen<sup>4</sup>, Tim  
4 Blackmore<sup>1,2</sup>, Max Bloomfield\*<sup>1,2</sup>

5 1. Department of Infection Services, Te Whatu Ora/Health New Zealand, Capital, Coast and  
6 Hutt Valley, Wellington, NZ

7 2. Department of Microbiology, Awanui Laboratories Wellington, Wellington, NZ

8 3. Department of Pharmacy, Te Whatu Ora/Health New Zealand, Capital, Coast and Hutt  
9 Valley, Wellington, NZ

10 4. Department of Surgical Services, Te Whatu Ora/Health New Zealand, Capital, Coast and Hutt  
11 Valley, Wellington, NZ

12

13 **\*Corresponding author:**

14 M Bloomfield; [maxim.bloomfield@ccdhb.org.nz](mailto:maxim.bloomfield@ccdhb.org.nz);

15 Wellington Regional Hospital

16 Riddiford Street

17 Newtown

18 Wellington 6019

19 New Zealand

20

21

22 **Abstract:**

23 Aim: Our antimicrobial guidelines (AGs) were changed in 2021 to recommend once-daily ceftriaxone  
24 in place of three-times-daily cefuroxime as preferred cephalosporin. This analysis sought to assess  
25 the effects of this on incidence of *Clostridioides difficile* infection (CDI), third-generation  
26 cephalosporin resistant Enterobacterales (3GCR-E), and resource utilisation.

27 Method: Before and after analysis of 30-day CDI and 3GCR-E incidence following receipt of  
28 cefuroxime/ceftriaxone pre- and post-AG change. Total nursing time and waste production relating  
29 to cefuroxime/ceftriaxone delivery were calculated pre- and post-change.

30 Results: CDI incidence was 0.6% pre- and 1.0% post-change (adjusted odds ratio [aOR] 1.44, p=0.07)  
31 and 3GCR-E incidence 3.5% and 3.1% (aOR 0.90, p=0.33). Mean per-quarter estimated nursing  
32 administration time decreased from 2065 to 1163 hours (902 nurse-hour reduction) and antibiotic-  
33 related waste generation from 1131kg to 748kg (383kg reduction). Overall days of therapy per-  
34 quarter of cefuroxime/ceftriaxone were unchanged between periods.

35 Conclusion: This simplification of our AG from a three-times-daily to a once-daily antibiotic resulted  
36 in considerable savings for our hospital (roughly 1.7 full-time equivalent nurses and over a tonne of  
37 waste yearly), with no significant increases in CDI or 3GCR-E. The impact of dosing schedules on non-  
38 antibiotic-spectrum factors, such nursing time and resource usage, is worthy of consideration when  
39 designing AGs.

40

41

## 42 **Introduction**

43 A core tool in hospital antimicrobial stewardship (AMS) is the development of syndrome-specific  
44 antimicrobial guidelines (AGs).<sup>1</sup> Guideline-adherent empirical therapy is associated with reduced  
45 treatment failure, length of stay (LOS) and mortality.<sup>2</sup> Guideline development typically focuses on  
46 antimicrobial spectrum, route of administration, dose and duration. We believe that AMS should  
47 also promote responsible and sustainable use of limited resources including nursing time, patient  
48 comfort and convenience, and consumption of single-use plastic destined for landfill. This has  
49 parallels to the business concept of the ‘triple bottom line’, whereby success is measured not solely  
50 based on profit, but also in relation to the impact on people and the planet.

51 Using these principles, the AMS Committee at our institution changed the AGs in quarter 4 (Q4)  
52 2021 to replace cefuroxime 1.5 g intravenous (IV) 8-hourly with ceftriaxone 2 g IV once daily as the  
53 preferred cephalosporin for empiric treatment of a number of indications. Ceftriaxone was already  
54 the recommended beta-lactam for moderate-severe community acquired pneumonia. This change  
55 generated considerable debate within the committee, particularly regarding the potential to drive  
56 antimicrobial resistance and *Clostridioides difficile* infection (CDI). Balancing this potential risk were  
57 the likely benefits to the hospital system in terms of simplicity (to promote adherence), nursing time  
58 saved and reduction in consumables. Convenience for patients was a major consideration with less  
59 disruption to rest and fewer missed or late doses. The aim of this report is to describe the positive  
60 and negative impacts of the change two years after implementation.

61

## 62 **Methods**

63 *Setting*

64 Wellington Regional Hospital (WRH) is a 484-bed acute care tertiary hospital which covers all  
65 specialties except plastic surgery and rheumatology, and is aligned with Kenepuru Hospital (KPH), a  
66 131-bed community hospital. These hospitals service a population of around 500,000 people.

67 In Q4 2021, in addition to the AG changes described above, piperacillin-tazobactam was changed to  
68 cefepime for febrile neutropenia and severe hospital-acquired infection, and piperacillin-tazobactam  
69 changed to amoxicillin-clavulanate for mild-moderate hospital-acquired infection. There was  
70 widespread internal communication regarding these changes, and our AGs were updated on our  
71 hospital intranet and mobile app.<sup>3</sup>

#### 72 *Data extraction and creation of cohorts*

73 Medication dispensing at WRH/KPH uses BD Pyxis™, which permits data extraction for all individual  
74 dispensing events. The exception to this is the Emergency Department (ED), for which dispensing  
75 records were unavailable. The Pyxis data were used to create two cohorts for analysis: 1) patients  
76 aged >16 years who received at least 2 consecutive days of either IV cefuroxime or IV ceftriaxone; 2)  
77 patients aged >16 years who received at least 2 consecutive days of any other antibiotic via any  
78 route. Patients were excluded from this group if they had received cefuroxime, ceftriaxone,  
79 piperacillin-tazobactam, cefepime or amoxicillin-clavulanate within 30 days before or after the start  
80 of their course. The intention of the second cohort was to provide a comparator group with  
81 antibiotic use that was relatively unaffected by AG changes. Patient demographics and admission  
82 information were extracted from the hospital data warehouse, and microbiology data were  
83 extracted from the Awanui Laboratories Wellington laboratory information system, which provides  
84 both hospital and community microbiology services for the entire region.

#### 85 *Definitions*

86 The pre-change period was defined as 2019 Q1 to 2021 Q3, and the post-change period as 2022 Q1  
87 to 2023 Q3. Q4 2021 was excluded because the new AGs were only partially embedded at this time.

88 For each patient incident CDI was defined as either a positive direct fecal toxin enzyme  
89 immunoassay result or a positive toxigenic culture result within 2-30 days of the start of the  
90 antibiotic course. Incident ESBL/third-generation cephalosporin-resistant Enterobacterales  
91 (ESBL/3GCR-E) were defined as isolation of one of these organisms from any sample type within the  
92 same time window. An overnight dose of an antibiotic was defined as a dispensing event between  
93 10pm and 6am.

#### 94 *Estimates of administration time and waste*

95 The time taken to administer a dose of IV antibiotics was estimated at 22 minutes.<sup>4</sup> Weight  
96 estimates were obtained by collecting all the waste (antibiotic vials, giving sets, tubing, syringes,  
97 gloves, etc.) associated with delivery of each antibiotic over a 24-hour period and then dividing by  
98 the number of doses to generate an average weight per dose. Given the scarcity of patients on  
99 cefuroxime in the hospital, these weights were estimated from IV amoxicillin-clavulanate, which has  
100 the same dose frequency and almost exactly the same use of vials and consumables. This gave a  
101 weight of 84.5 g and 239.1 g for a 2 g dose of ceftriaxone via push and infusion, respectively, and  
102 103.3 g and 195.6 g for cefuroxime. The infusion weight was used to estimate the overall waste  
103 generation because this is the predominant mode of delivery in our institution.

104

#### 105 *Analysis*

106 Outcomes of interest were: 1) the 30-day incidence of CDI and ESBL/3GCR-E in each cohort; 2)  
107 estimated total nursing time spent administering IV antibiotics, estimated total IV-associated waste  
108 generation, and total overnight doses administered in the cephalosporin cohort. These outcomes  
109 were compared across the time periods, with the Chi-squared test used to compare categorical  
110 variables, and the Mann-Whitney-U test for continuous variables. A multivariate logistic regression  
111 model was created to determine which covariates in the cephalosporin cohort were independently

112 associated with increased odds of CDI and ESBL/3GCR-E. Analysis was performed in Stata 17 (College  
113 Station, Texas). This analysis was part of the routine ongoing monitoring activities undertaken at our  
114 hospital by the AMS committee, which is an ongoing Continuous Quality Improvement project to  
115 inform future guidelines. It was therefore out of scope for Health and Disability Ethics Committee  
116 review, as this analysis is classified as an 'audit or related activity'. Hospital Clinical Audit Committee  
117 approval was gained.

118

## 119 **Results**

120 The characteristics of the cephalosporin cohort are shown in Table 1. In the pre-change period,  
121 85.7% of the cohort received cefuroxime, whereas in the post-change period 94.2% received  
122 ceftriaxone, consistent with the change in AGs. The pre- and post-change groups were otherwise  
123 broadly similar, other than a decrease in general surgical patients and an increase in general medical  
124 patients in the post-change period. Mean days of therapy (DOT) with cefuroxime/ceftriaxone within  
125 30 days of the initial dose were similar across time periods (4.1 vs 4.0,  $p=0.01$ ). CDI incidence was  
126 0.6% in the pre-change, versus 1.0% in the post-change period ( $p=0.02$ ). Isolation of ESBL/3GCR-E  
127 within 30-days was 3.5% pre-change versus 3.1% ( $p=0.31$ ) post-change. Characteristics of the  
128 comparator group are shown in Table 2. The major difference compared to the cephalosporin cohort  
129 was that there were fewer general surgical patients (6.6% and 5.1% of the cohort pre- and post-  
130 change) and more subspecialty surgical patients (39.8% and 46.5%). The incidence of CDI was lower  
131 than the cephalosporin cohort and did not change between time periods (0.2% and 0.2%,  $p=0.68$ )  
132 and incidence of ESBL/3GCR-E was not significantly different between periods (1.4% versus 1.7%,  
133  $p=0.13$ ). Figure 1. shows CDI incidence over time in the two cohorts. The incidence increased prior to  
134 the AG change in the cephalosporin cohort, appeared to peak shortly after the change, and  
135 decreased after this, whereas the incidence appeared stable across both time periods in the  
136 comparator group.

137 Table 3. shows the multivariate analysis results for CDI. Several covariates were associated with  
138 increased odds of CDI in the cephalosporin cohort, with the strongest being a prior diagnosis of CDI  
139 within the last year (aOR 11.3, 95%-CI 5.25-24.33,  $p < 0.01$ ), and cefuroxime/ceftriaxone DOT within  
140 30 days of index dose (aOR 1.07 for each additional DOT, 95%-CI 1.02-1.13,  $p = 0.01$ ). The odds of CDI  
141 in the post-change period was no longer statistically significantly higher than the pre-change period  
142 (aOR 1.44, 95%-CI 0.97-2.12,  $p = 0.07$ ). The results of the multivariate analysis for ESBL/3GCR-E  
143 showed an aOR of 0.91 (95%-CI 0.74-1.11,  $p = 0.34$ ) for incident ESBL/3GCR-E in the post-change  
144 period (Supplementary materials).

145 Table 4. shows the hospital-wide effects of the change in cephalosporin AGs between time periods.  
146 The hospital was busier in the post-change period (additional 2487 occupied bed days per quarter),  
147 but despite this, total cefuroxime/ceftriaxone DOT was very similar (2595 DOT versus 2599 DOT per  
148 quarter). As expected, there was a marked decrease in mean cefuroxime DOT per quarter (2067  
149 versus 105) and increase for ceftriaxone (528 versus 2494). There was a large decrease in mean  
150 combined cefuroxime/ceftriaxone dosing events per quarter (5633 to 3172, decrease of 2461),  
151 which translated to large reductions in estimated nursing time consumption (2065 hours per quarter  
152 versus 1163, reduction of 902) and estimated waste generated for infusion delivery (1131kg to  
153 748kg, reduction of 383kg). The mean number of overnight dosing events also decreased  
154 substantially (1777 versus 588, decrease of 1189 per quarter).

155

## 156 Discussion

157 This study demonstrates widespread hospital acceptance of pragmatic guidelines which take into  
158 consideration nursing workloads and patient convenience, with no statistically significant increase in  
159 CDI or resistant organisms. We argue that these principles should be significant considerations for  
160 the development of AGs, and that AMS should consider this 'triple bottom line' framework, rather  
161 than focusing solely on the implications of antibiotic spectrum. Our programme emphasizes the

162 importance of ongoing monitoring of resistant organisms and CDI, to ensure that we do not cause  
163 harm to the wider patient group in the name of nursing and individual patient convenience.

164 NZ has a health workforce crisis, and it is especially important that nursing time is used optimally  
165 with improvements in workflow implemented where possible.<sup>5</sup> A major benefit with the guideline  
166 change was the reduction in nursing time spent preparing and delivering IV antibiotics, primarily due  
167 to recommending a once-daily antibiotic. A mean estimated reduction of 902 nursing hours per  
168 quarter was realised, which equates to almost 10 hours per day, or roughly 1.7 full-time equivalent.  
169 In a period when there is a shortage of nurses, the ability to reallocate scarce nursing resource to  
170 other care priorities is a considerable advantage. Furthermore, overstretched nurses are known to  
171 be less compliant with hand hygiene and other infection control principles, so a reduction in  
172 workload may be beneficial in this regard, which is in line with the goals of AMS.<sup>6</sup>

173 Both ceftriaxone 2 g and cefuroxime 1.5 g can be administered as either a push (3-5 minutes for  
174 cefuroxime, 4-8 minutes for ceftriaxone) or via a 30-minute infusion.<sup>7</sup> While push administration is  
175 associated with less waste and overall time of delivery, observation during this study showed that  
176 infusion remains standard practise in our hospital. In several studies, an IV push antibiotic was  
177 associated with reduced time spent delivering doses compared to infusions, faster time to first dose  
178 and reduced consumables and costs per dose event.<sup>8-10</sup> Antibiotic infusion may also result in  
179 wastage of up to 24% of the dose if the residual volume is not flushed, an issue not present for bolus  
180 dosing.<sup>10</sup> A program to encourage IV push of appropriate antibiotics may be a useful next step at our  
181 institution, although the convenience of being able to perform other tasks once an infusion has been  
182 hung is a common advantage cited by our nurses, so the reported time savings of push  
183 administration may be less relevant, although would still result in savings in waste.

184 Our findings suggest that a significant reduction in waste can be achieved with once-daily antibiotics  
185 such as ceftriaxone. We estimated that up to 383kg per quarter of consumable waste, or over a  
186 tonne of waste per year, was saved by the guideline changes (assuming infusion delivery; the



187 quarterly estimate would be 297kg if all delivery was via push). Hospital waste contributes almost  
188 5% of global greenhouse gas emissions and uses substantial plastic consumables.<sup>11,12</sup> In NZ, most of  
189 the consumables are imported, adding to the emission footprint. Minimising single-use consumables  
190 (IV tubing, syringes, flush vials, plastic fluid bags) should be a priority for hospitals given the threats  
191 to human health from environmental contamination and climate change.<sup>11,12</sup> It should be noted that  
192 the time savings and waste generated are based on per-dose estimates and the final numbers  
193 should not be considered exact, however they are likely to be a good indication of the magnitude of  
194 potential savings.

195 Use of a once-a-day antibiotic improves patient comfort and convenience, and should eliminate the  
196 need to give overnight doses, other than the first dose in patients presenting overnight. There was a  
197 reduction of 1189 doses given overnight compared to the pre-change period. However, 22.6% of  
198 doses were still given in the overnight period. This suggests a failure to chart antimicrobials at more  
199 nurse- and patient-friendly times by doctors, who may not think of the negative impact on patient  
200 sleep and workload for nurses overnight – a time where staffing levels are lower. Interventions  
201 aimed at changing workflows including time of medication administration have been shown to be  
202 successful at improving sleep disruption for patients.<sup>13,14</sup> This is an area to target for prescriber  
203 education in our institution. A further advantage of once daily dosing is that it frees up patient time  
204 for other important aspects of their care, such as allied health, radiology, or other therapies.

205 Critics of our approach may emphasise the potential harms of ceftriaxone when compared to  
206 cefuroxime due to its broader spectrum. Although there are theoretical concerns regarding the  
207 emergence of antimicrobial resistance and CDI with use of broad-spectrum antibiotics, studies are  
208 heterogenous and do not provide simple answers. Antibiotics clearly have a profound effect on the  
209 microbiome, and this can be persistent but the effect is complex.<sup>15</sup> Cephalosporins are associated  
210 with increased carriage of AmpC and ESBL-producing organisms.<sup>16</sup> Ceftriaxone and cefuroxime both  
211 promote increases in *bla*<sub>CTX-M</sub> abundance, with one study demonstrating a 22% per day increase in

212 CTX-M genes in patients exposed to cefuroxime and 10% increase for patients on ceftriaxone.<sup>17</sup>  
213 Short course antibiotics impact less on AMR genes in gut microbiome, and some studies have shown  
214 that the spectrum of antibiotics has less impact than duration of exposure, thus the impact on the  
215 microbiome depends on a range of factors including duration, route of administration as well as  
216 antibiotic spectrum.<sup>15,18,19</sup> Our data to date did not show an increase in ESBL-producing organisms  
217 relating to the change in cephalosporin AGs.

218 Data on antibiotic-specific risk for CDI is also challenging due to heterogenous methods and study  
219 design. Miller recently showed that cefuroxime has a similar odds ratio for CDI to third generation  
220 cephalosporins, however, their study used cefpodoxime rather than ceftriaxone.<sup>20</sup> The EUCLID study  
221 showed CDI risk was based on complex factors, not just antibiotic selection, and were unable to  
222 show a clear association with overall cephalosporin prescribing.<sup>21</sup> An older systematic review and  
223 meta-analysis showed an OR of 3.2 for ceftriaxone compared to 2.23 for cefuroxime for CDI.<sup>22</sup> Our  
224 data showed a non-statistically significant increase in 30-day CDI incidence in the post-change  
225 period. However, the incidence appeared to have been gradually increasing over time prior to the  
226 change, with a peak shortly after the change, and subsequent return towards baseline levels.  
227 Ongoing surveillance will provide more robust data regarding the effects of guideline changes but so  
228 far there are no convincing clinical data that establishes ceftriaxone to be a higher risk antibiotic  
229 than cefuroxime for the risk of CDI or antimicrobial resistance.

230 The overall impact of initial empirical antimicrobials used in a hospital setting on the development of  
231 resistant gram negatives and CDI is likely to be less significant than the ongoing antimicrobial use in  
232 terms of spectrum and duration, and that of community prescribing, which in NZ accounts for  
233 around 95% of human antibiotic consumption.<sup>23</sup> In an AMS programme that prioritizes early review,  
234 IV to oral switch, and short courses, we have shown that taking a pragmatic initial approach helps  
235 our nursing colleagues, patients and the environment. Whilst it is clear that antibiotics are a precious  
236 and limited resource, we believe it is important to consider the other resources that antibiotic

237 administration requires. Analysis of antibiotic use should be broadened to include a ‘triple bottom  
238 line’ approach, considering impact on nursing workload, patient comfort, and environmental impact.  
239 We believe that these are important considerations for institutional guidelines and should form part  
240 of any contemporary AMS strategy. Integral to these concepts is actively monitoring the positive and  
241 negative impact of changes and responding to the findings objectively.

242

243

#### 244 **Competing interests**

245 The authors have no conflicts of interest to declare.

#### 246 **Funding**

247 This work was supported by internal departmental funds.

#### 248 **Acknowledgements**

249 The authors would like to thank Matthew Ordish for assistance in accessing Pyxis data and Peter  
250 Wash for assistance in accessing hospital bed occupancy and demographic data.

251

## 252 References

- 253 1. Centers for Disease Control and Prevention. The Core Elements of Hospital Antibiotic  
254 Stewardship Programs: 2019 [Internet]. Atlanta, GA: US Department of Health and Human  
255 Services, CD. 2019 [cited 2023 Oct 25]. Available from: [https://www.cdc.gov/antibiotic-](https://www.cdc.gov/antibiotic-use/healthcare/pdfs/hospital-core-elements-H.pdf)  
256 [use/healthcare/pdfs/hospital-core-elements-H.pdf](https://www.cdc.gov/antibiotic-use/healthcare/pdfs/hospital-core-elements-H.pdf)
- 257 2. Schuts EC, Hulscher MEJL, Mouton JW, Verduin CM, Stuart JWTC, Overdiek HWPM, et al.  
258 Current evidence on hospital antimicrobial stewardship objectives: a systematic review and  
259 meta-analysis. *Lancet Infect Dis*. 2016 Jul;16(7):847–56.
- 260 3. Bupha-Intr O. ‘empiric’ [Internet]. 2021 [cited 2023 Dec 9]. Available from:  
261 <https://play.google.com/store/apps/details?id=online.aidanwilson.empiricupdate>
- 262 4. Jenkins A. IV to oral switch: a novel viewpoint. *Journal of Antimicrobial Chemotherapy*. 2023  
263 Oct 3;78(10):2603–4.
- 264 5. Peters M. Time to solve persistent, pernicious and widespread nursing workforce shortages.  
265 *Int Nurs Rev*. 2023 Jun 1;70(2):247–53.
- 266 6. Scheithauer S, Batzer B, Dangel M, Passweg J, Widmer A. Workload even affects hand  
267 hygiene in a highly trained and well-staffed setting: a prospective 365/7/24 observational  
268 study. *Journal of Hospital Infection*. 2017 Sep;97(1):11–6.
- 269 7. New Zealand Hospital Pharmacists’ Association. Notes on Injectable Drugs. 2021 Aug;
- 270 8. Rech MA, Gottlieb M. Intravenous Push Antibiotics Should be Administered in the Emergency  
271 Department. *Ann Emerg Med*. 2021 Sep;78(3):384–5.
- 272 9. Academia EC, Jenrette JE, Mueller SW, McLaughlin JM. Evaluation of First-Dose, Intravenous  
273 Push Penicillins and Carbapenems in the Emergency Department. *J Pharm Pract*. 2022 Jun  
274 11;35(3):369–76.
- 275 10. Missiaen L, De Schoenmakere G, Valcke L, Decroix N. Assessment Intermittent Dosing of  
276 Antibiotics: IV infusion or IV push? The impact of administration technique on dose delivered,  
277 nursing practice and hospital budget. *Arch Med (Oviedo)*. 2022;14(1):1–3.
- 278 11. Tomson C. Reducing the carbon footprint of hospital-based care. *Future Hosp J*. 2015  
279 Feb;2(1):57–62.
- 280 12. Smith M, Singh H, Sherman JD. Infection Prevention, Planetary Health, and Single-Use  
281 Plastics. *JAMA*. 2023 Nov 28;330(20):1947.
- 282 13. Kadura S, Siala T, Arora VM. Perspective: leveraging the electronic health record to improve  
283 sleep in the hospital. *Journal of Clinical Sleep Medicine*. 2023 Feb;19(2):421–3.
- 284 14. Arora VM, Machado N, Anderson SL, Desai N, Marsack W, Blossomgame S, et al. Effectiveness  
285 of SIESTA on Objective and Subjective Metrics of Nighttime Hospital Sleep Disruptors. *J Hosp*  
286 *Med*. 2019 Jan;14(1):38–41.
- 287 15. Zimmermann P, Curtis N. The effect of antibiotics on the composition of the intestinal  
288 microbiota - a systematic review. *Journal of Infection*. 2019 Dec;79(6):471–89.

- 289 16. Meletiadiis J, Turlej-Rogacka A, Lerner A, Adler A, Tacconelli E, Mouton JW, et al. Amplification  
290 of Antimicrobial Resistance in Gut Flora of Patients Treated with Ceftriaxone. *Antimicrob*  
291 *Agents Chemother*. 2017 Nov;61(11).
- 292 17. Niehus R, van Kleef E, Mo Y, Turlej-Rogacka A, Lammens C, Carmeli Y, et al. Quantifying  
293 antibiotic impact on within-patient dynamics of extended-spectrum beta-lactamase  
294 resistance. *Elife*. 2020 May 7;9.
- 295 18. Munck C, Sheth RU, Cuaresma E, Weidler J, Stump SL, Zachariah P, et al. The effect of short-  
296 course antibiotics on the resistance profile of colonizing gut bacteria in the ICU: a prospective  
297 cohort study. *Crit Care*. 2020 Dec 9;24(1):404.
- 298 19. Saliba R, Mizrahi A, Gauthier P de P, Alban LM, Zahar JR, Pilmis B. Antimicrobial Stewardship  
299 Program: Reducing Antibiotic’s Spectrum of Activity Is not the Solution to Limit the  
300 Emergence of Multidrug-Resistant Bacteria. *Antibiotics*. 2022 Jan 7;11(1):70.
- 301 20. Miller AC, Arakkal AT, Sewell DK, Segre AM, Tholany J, Polgreen PM. Comparison of Different  
302 Antibiotics and the Risk for Community-Associated *Clostridioides difficile* Infection: A Case-  
303 Control Study. *Open Forum Infect Dis*. 2023 Aug 1;10(8).
- 304 21. Wilcox MH, Chalmers JD, Nord CE, Freeman J, Bouza E. Role of cephalosporins in the era of  
305 *Clostridium difficile* infection. *Journal of Antimicrobial Chemotherapy*. 2017 Jan;72(1):1–18.
- 306 22. Slimings C, Riley T V. Antibiotics and hospital-acquired *Clostridium difficile* infection: update  
307 of systematic review and meta-analysis. *Journal of Antimicrobial Chemotherapy*. 2014  
308 Apr;69(4):881–91.
- 309 23. Duffy E, Ritchie S, Metcalfe S, Van Bakel B, Thomas MG. Antibacterials dispensed in the  
310 community comprise 85%-95% of total human antibacterial consumption. *J Clin Pharm Ther*.  
311 2018 Feb 1;43(1):59–64.

312

313

314

Table 1. Characteristics and outcomes of the cephalosporin cohort pre- and post-change in antimicrobial guidelines.

|                                           | Pre-change |             | Post-change |             | p-value |
|-------------------------------------------|------------|-------------|-------------|-------------|---------|
| Total patients                            | 8342       |             | 5107        |             |         |
| Received cefuroxime                       | 7150       | 85.7%       | 296         | 5.8%        |         |
| Received ceftriaxone                      | 1192       | 14.3%       | 4811        | 94.2%       |         |
| Age (years), median, IQR                  | 60.3       | (39.3,75.5) | 64.9        | (47.1,76.9) | <0.01   |
| Female                                    | 4616       | 55.3%       | 2675        | 52.5%       | <0.01   |
| Ethnicity                                 |            |             |             |             | 0.01    |
| Other or unknown                          | 1486       | 17.8%       | 830         | 16.3%       |         |
| NZ Māori                                  | 1099       | 13.2%       | 679         | 13.3%       |         |
| Pacific Island                            | 778        | 9.3%        | 569         | 11.1%       |         |
| NZ European                               | 4335       | 52.0%       | 2643        | 51.8%       |         |
| Asian                                     | 644        | 7.7%        | 386         | 7.6%        |         |
| Specialty grouped                         |            |             |             |             | <0.01   |
| General medicine                          | 2273       | 27.2%       | 1700        | 33.3%       |         |
| Subspecialty medicine                     | 429        | 5.1%        | 330         | 6.5%        |         |
| Hematology/Oncology                       | 669        | 8.0%        | 471         | 9.2%        |         |
| Intensive care                            | 181        | 2.2%        | 191         | 3.7%        |         |
| General surgery                           | 2591       | 31.1%       | 1270        | 24.9%       |         |
| Subspecialty surgery                      | 891        | 10.7%       | 596         | 11.7%       |         |
| Older persons' health                     | 70         | 0.8%        | 42          | 0.8%        |         |
| Women's health                            | 1023       | 12.3%       | 383         | 7.5%        |         |
| Emergency department <sup>a</sup>         | 202        | 2.4%        | 119         | 2.3%        |         |
| Other                                     | 13         | 0.2%        | 4           | 0.1%        |         |
| Hospitalized in the last 365 days         | 4139       | 49.6%       | 2588        | 50.7%       | 0.21    |
| CDI in prior 365 days                     | 39         | 0.5%        | 43          | 0.8%        | <0.01   |
| Cefuroxime/ceftriaxone DOT within 30 days | 4.1        | 2.9         | 4.0         | 2.7         | 0.01    |
| Incident CDI within 30 days               | 54.0       | 0.6%        | 52          | 1.0%        | 0.02    |
| ESBL/3GCR-E culture within 30 days        | 289        | 3.5%        | 159         | 3.1%        | 0.31    |

IQR, inter quartile range; CDI, *Clostridioides difficile* infection; DOT, days of therapy; ESBL/3GCRE-E, extended-spectrum beta-lactamase or third generation cephalosporin-resistant Enterobacterales.

<sup>a</sup>Although emergency department Pyxis data were unavailable, some patients were still coded as being under emergency once they had been admitted to a ward and received their first antibiotic dose.

Table 2. Characteristics and outcomes of the comparator cohort pre- and post-change in antimicrobial guidelines.

|                                             | Pre-change |             | Post-change |             | p-value |
|---------------------------------------------|------------|-------------|-------------|-------------|---------|
| Total patients                              | 16547      |             | 7237        |             |         |
| Age                                         | 62.2       | (39.7,76.2) | 65.2        | (47.2,77.8) | <0.01   |
| Female                                      | 9232       | 55.8%       | 3847        | 53.2%       | <0.01   |
| Ethnicity                                   |            |             |             |             | <0.01   |
| Other or unknown                            | 2566       | 15.5%       | 1005        | 13.9%       |         |
| NZ Māori                                    | 2349       | 14.2%       | 1052        | 14.5%       |         |
| Pacific Island                              | 1466       | 8.9%        | 682         | 9.4%        |         |
| NZ European                                 | 9197       | 55.6%       | 4110        | 56.8%       |         |
| Asian                                       | 969        | 5.9%        | 388         | 5.4%        |         |
| Specialty grouped                           |            |             |             |             | <0.01   |
| General medicine                            | 3391       | 20.5%       | 1551        | 21.4%       |         |
| Subspecialty medicine                       | 1974       | 11.9%       | 749         | 10.3%       |         |
| Hematology/Oncology                         | 625        | 3.8%        | 267         | 3.7%        |         |
| Intensive care                              | 141        | 0.9%        | 85          | 1.2%        |         |
| General surgery                             | 1086       | 6.6%        | 369         | 5.1%        |         |
| Subspecialty surgery                        | 6583       | 39.8%       | 3368        | 46.5%       |         |
| Older persons' health                       | 399        | 2.4%        | 191         | 2.6%        |         |
| Women's health                              | 1942       | 11.7%       | 483         | 6.7%        |         |
| Emergency department                        | 340        | 2.1%        | 141         | 1.9%        |         |
| Other                                       | 66         | 0.4%        | 30          | 0.4%        |         |
| Hospitalized in the last 365 days           | 7647       | 46.2%       | 3377        | 46.7%       | 0.53    |
| CDI in prior 365 days                       | 80         | 0.5%        | 49          | 0.7%        | 0.06    |
| Total antibiotic LOT within 30 days         | 3.4        | 3.4         | 4.1         | 3.5         | <0.01   |
| Incident CDI within 30 days                 | 34.0       | 0.2%        | 13.0        | 0.2%        | 0.68    |
| ESBL/3GCR-E positive culture within 30 days | 234        | 1.4%        | 121         | 1.7%        | 0.13    |

IQR, inter quartile range; CDI, *Clostridioides difficile* infection; LOT, length of therapy; ESBL/3GCRE-E, extended-spectrum beta-lactamase or third generation cephalosporin-resistant Enterobacterales.

316

317

Table 3. Multiple logistic regression model for odds of incident CDI in the cephalosporin cohort, by different patient characteristics

|                                           | aOR               | 95% CI        | p-value |
|-------------------------------------------|-------------------|---------------|---------|
| Age                                       | 1.02 <sup>a</sup> | (1.00, 1.03)  | 0.01    |
| Female                                    | 1.68              | (1.12, 2.50)  | 0.01    |
| Ethnicity                                 |                   |               |         |
| Other or unknown                          | 1.00              |               |         |
| NZ Māori                                  | 1.40              | (0.71, 2.76)  | 0.34    |
| Pacific Island                            | 0.32              | (0.09, 1.09)  | 0.07    |
| NZ European                               | 1.04              | (0.61, 1.77)  | 0.89    |
| Asian                                     | 0.64              | (0.21, 1.90)  | 0.42    |
| Specialty grouped                         |                   |               |         |
| General medicine                          | 1.00              |               |         |
| Subspecialty medicine                     | 1.74              | (0.76, 3.96)  | 0.19    |
| Hematology/Oncology                       | 2.19              | (1.15, 4.16)  | 0.02    |
| Intensive care                            | 2.52              | (0.94, 6.77)  | 0.07    |
| General surgery                           | 1.12              | (0.62, 2.01)  | 0.72    |
| Subspecialty surgery                      | 2.40              | (1.32, 4.37)  | <0.01   |
| Older persons' health                     | 2.68              | (0.77, 9.25)  | 0.12    |
| Women's health                            | 0.41              | (0.09, 1.90)  | 0.26    |
| Emergency department                      | - <sup>b</sup>    |               |         |
| Other                                     | - <sup>b</sup>    |               |         |
| Hospitalized in the last 365 days         | 1.41              | (0.92, 2.15)  | 0.12    |
| CDI in prior 365 days                     | 11.30             | (5.25, 24.33) | <0.01   |
| Cefuroxime/ceftriaxone DOT within 30 days | 1.07 <sup>a</sup> | (1.02, 1.13)  | 0.01    |
| Post-change period patient                | 1.44              | (0.97, 2.12)  | 0.07    |

aOR, adjusted odds ratio; CDI, *Clostridioides difficile* infection; DOT, days of therapy

<sup>a</sup>Odds ratio here represents increased odds per unit increase in the variable.

<sup>b</sup>Insufficient outcomes in these groups to generate an odds ratio.

318

319

320

321



Table 4. Mean usage and resource consumption for cefuroxime and ceftriaxone per quarter pre- and post-change in guidelines

|                                                   | Mean per quarter |       | Difference |
|---------------------------------------------------|------------------|-------|------------|
|                                                   | Pre              | Post  |            |
| Occupied bed days                                 | 36535            | 39022 | 2487       |
| <b>Days of therapy</b>                            |                  |       |            |
| Cefuroxime                                        | 2067             | 105   | -1962      |
| Ceftriaxone                                       | 528              | 2494  | 1966       |
| Total                                             | 2595             | 2599  | 4          |
| <b>Dosing events and estimated resource usage</b> |                  |       |            |
| Cefuroxime dosing events                          | 4958             | 237   | -4721      |
| Nursing hours consumption <sup>a</sup>            | 1818             | 87    | -1731      |
| Waste generated <sup>b</sup> (kg)                 | 970              | 46    | -923       |
| Overnight doses <sup>c</sup>                      | 1691             | 82    | -1609      |
| Ceftriaxone dosing events                         | 675              | 2935  | 2260       |
| Nursing hours consumption <sup>a</sup>            | 248              | 1076  | 828        |
| Waste generated <sup>b</sup> (kg)                 | 161              | 701   | 540        |
| Overnight doses <sup>c</sup>                      | 86               | 507   | 421        |
| Total dosing events                               | 5633             | 3172  | -2461      |
| Nursing hours consumption <sup>a</sup>            | 2065             | 1163  | -902       |
| Waste generated <sup>b</sup> (kg)                 | 1131             | 748   | -383       |
| Overnight doses <sup>c</sup>                      | 1777             | 588   | -1189      |

<sup>a</sup>Based on an assumed 22 minute delivery time.

<sup>b</sup>Based on assumed infusion delivery.

<sup>c</sup>Overnight dose defined as between 10pm and 6am.

322

323

324

325 **Figure Legend**

326 **Figure 1.** Thirty-day incidence of *Clostridioides difficile* infection by quarter in the cephalosporin and

327 comparator cohorts, with linear trend line and 95% confidence interval.

328

Incidence per 100 courses

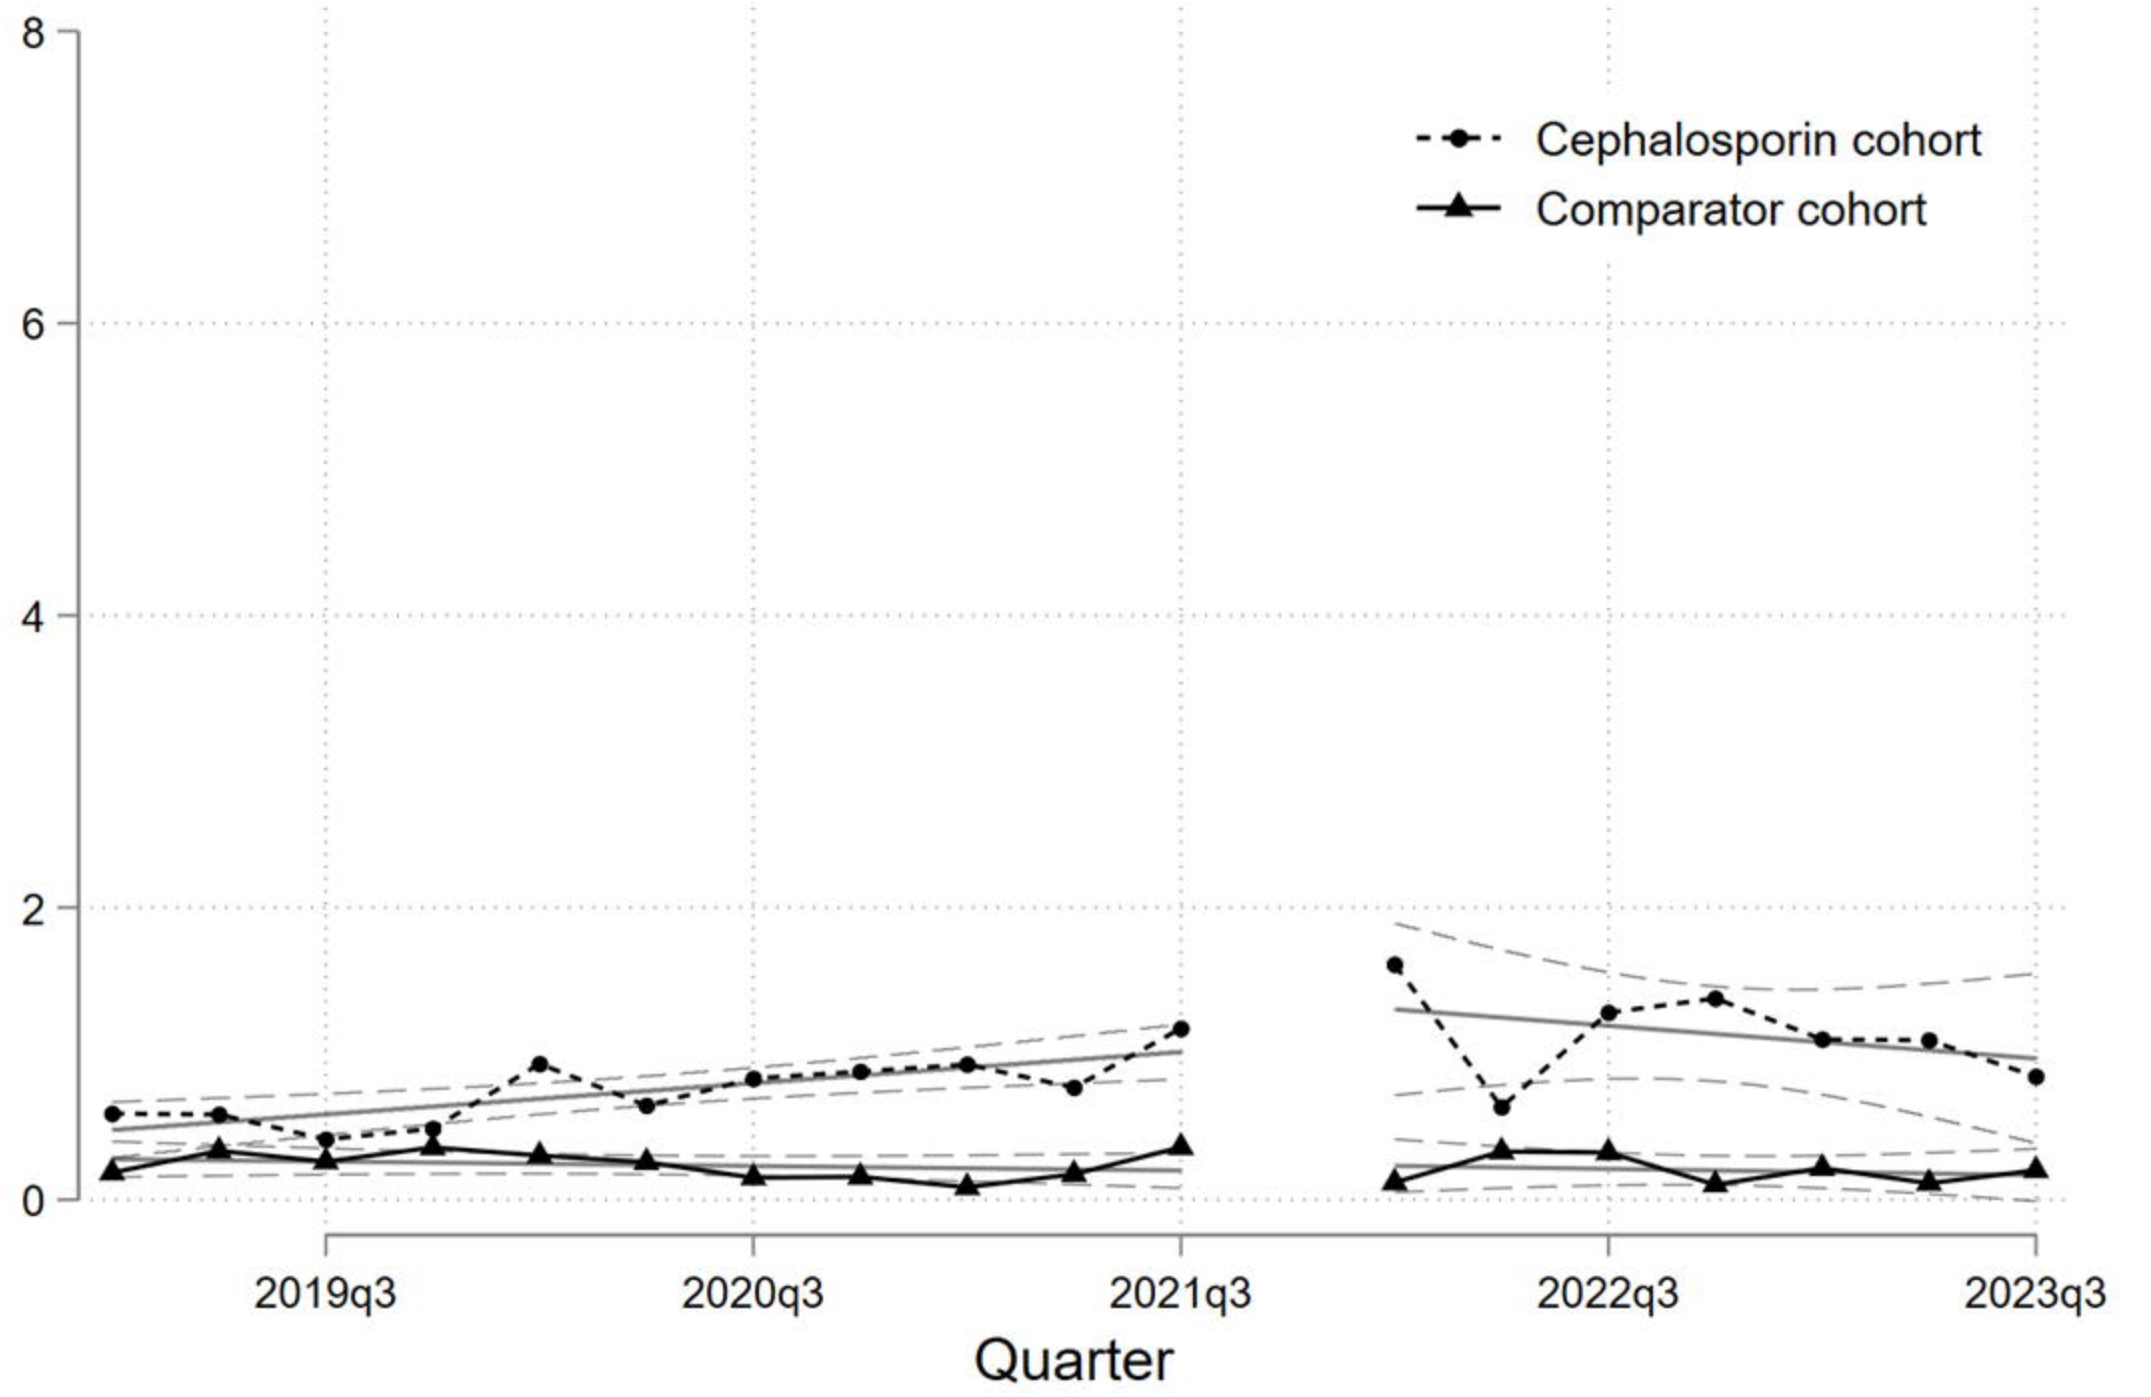

Source: http://medrxiv.org/content/10.1101/2023.12.21.23300392v1.full.pdf
